# Supplementary material for: In vitro insulin treatment reverses changes elicited by nutrients in cellular metabolic processes that regulate food intake in fish
Source: Oxford University Press journal article supplement (doi:10.1242/jeb.213454), 2020-01-01
Supplement: jeb213454supp.pdf [file jeb213454supp.pdf]

**Table S1.** P-values obtained after two-way ANOVA analysis of parameters assessed in rainbow trout hypothalamus after incubation with 600  $\mu$ l of culture media alone (control) or containing 8 mM glucose or 500  $\mu$ M oleate, in the absence or presence of 1  $\mu$ M insulin for 3 h. Nutrient (none, glucose, oleate) and insulin (absence, presence) treatments were the main factors, whereas nutrient x insulin was the first order interaction.

|                                 |                           | <b>Factor 1</b> | <b>Factor 2</b> | <b>Interaction</b>        |
|---------------------------------|---------------------------|-----------------|-----------------|---------------------------|
|                                 | <b>Parameter</b>          | <b>Nutrient</b> | <b>Insulin</b>  | <b>Nutrient x Insulin</b> |
| <b><u>Enzyme activities</u></b> | <b>Glucosensing</b>       |                 |                 |                           |
|                                 | Gck                       | 0.023           | 0.427           | <0.001                    |
|                                 | Gsase                     | 0.006           | <0.001          | 0.002                     |
|                                 | Pepck                     | <0.001          | 0.694           | 0.003                     |
|                                 | Pk                        | 0.451           | 0.081           | 0.538                     |
|                                 | <b>Fatty acid sensing</b> |                 |                 |                           |
|                                 | Acly                      | 0.001           | 0.025           | 0.079                     |
|                                 | Cpt-1                     | 0.290           | 0.890           | 0.533                     |
|                                 | Fas                       | <0.001          | 0.101           | 0.033                     |
|                                 | Hoad                      | 0.009           | 0.029           | 0.002                     |
| <b><u>mRNA abundance</u></b>    | <b>Glucosensing</b>       |                 |                 |                           |
|                                 | <i>fbpase</i>             | 0.185           | 0.902           | 0.358                     |
|                                 | <i>g6pcb</i>              | 0.022           | 0.619           | 0.003                     |
|                                 | <i>gck</i>                | 0.001           | 0.007           | 0.043                     |
|                                 | <i>gnat3</i>              | 0.430           | 0.099           | 0.002                     |
|                                 | <i>gys1</i>               | 0.159           | 0.249           | 0.442                     |
|                                 | <i>nr1h3</i>              | 0.035           | 0.090           | <0.001                    |
|                                 | <i>pck1</i>               | 0.002           | 0.303           | 0.213                     |
|                                 | <i>pklr</i>               | 0.003           | <0.001          | <0.001                    |
|                                 | <i>slc2a2</i>             | <0.001          | 0.487           | <0.001                    |
|                                 | <i>slc5a1</i>             | 0.111           | 0.301           | 0.022                     |
|                                 | <i>tas1r3</i>             | 0.190           | 0.071           | 0.010                     |
|                                 | <b>Fatty acid sensing</b> |                 |                 |                           |

|                              |                                |        |        |        |
|------------------------------|--------------------------------|--------|--------|--------|
|                              | <i>acly</i>                    | <0.001 | 0.080  | <0.001 |
|                              | <i>cd36</i>                    | <0.001 | 0.701  | 0.287  |
|                              | <i>cpt1c</i>                   | 0.312  | 0.063  | 0.797  |
|                              | <i>fasn</i>                    | 0.888  | 0.016  | 0.135  |
|                              | <i>lpl</i>                     | 0.870  | 0.654  | 0.256  |
|                              | <b>K<sub>ATP</sub></b>         |        |        |        |
|                              | <i>abcc8</i>                   | 0.054  | 0.398  | <0.001 |
|                              | <i>kcnj11</i>                  | 0.066  | 0.358  | 0.805  |
|                              | <b>Mitochondrial activity</b>  |        |        |        |
|                              | <i>ucp2a</i>                   | 0.459  | 0.311  | 0.303  |
|                              | <b>Cell signaling</b>          |        |        |        |
|                              | <i>mtor</i>                    | <0.001 | 0.488  | <0.001 |
|                              | <b>Transcription factors</b>   |        |        |        |
|                              | <i>bsx</i>                     | <0.001 | <0.001 | <0.001 |
|                              | <i>creb1</i>                   | <0.001 | 0.002  | 0.104  |
|                              | <i>foxo1</i>                   | 0.004  | 0.598  | 0.052  |
|                              | <i>ppara</i>                   | 0.008  | 0.382  | 0.013  |
|                              | <i>pparg</i>                   | 0.144  | 0.010  | 0.005  |
|                              | <i>srebf</i>                   | 0.284  | 0.629  | 0.142  |
|                              | <b>Neuropeptides</b>           |        |        |        |
|                              | <i>agrp1</i>                   | 0.006  | 0.200  | <0.001 |
|                              | <i>cartpt</i>                  | 0.685  | 0.118  | 0.432  |
|                              | <i>npy</i>                     | 0.003  | <0.001 | <0.001 |
|                              | <i>pomcal</i>                  | 0.005  | 0.563  | 0.001  |
| <b><u>Protein levels</u></b> | <b>Cell signaling</b>          |        |        |        |
|                              | P-Akt/vinculin                 | 0.153  | 0.907  | 0.334  |
|                              | Akt/vinculin                   | 0.094  | 0.024  | 0.058  |
|                              | P-Akt/Akt                      | 0.023  | 0.040  | <0.001 |
|                              | P-Ampk $\alpha$ /vinculin      | 0.304  | 0.099  | 0.439  |
|                              | Ampk $\alpha$ /vinculin        | 0.856  | 0.792  | 0.121  |
|                              | P-Ampk $\alpha$ /Ampk $\alpha$ | 0.020  | <0.001 | 0.316  |
|                              | Mtor/vinculin                  | 0.141  | 0.003  | 0.004  |
|                              | <b>Transcription factors</b>   |        |        |        |
|                              | P-Creb/vinculin                | 0.997  | 0.566  | 0.907  |

|  |                  |       |       |       |
|--|------------------|-------|-------|-------|
|  | Creb/vinculin    | 0.611 | 0.893 | 0.774 |
|  | P-Creb/Creb      | 0.674 | 0.325 | 0.029 |
|  | P-Foxo1/vinculin | 0.124 | 0.246 | 0.804 |
|  | Foxo1/vinculin   | 0.874 | 0.490 | 0.491 |
|  | P-Foxo1/Foxo1    | 0.798 | 0.553 | 0.353 |

**Table S2.** P-values obtained after two-way ANOVA analysis of parameters assessed in rainbow trout hindbrain after incubation with 600  $\mu$ l of culture media alone (control) or containing 8 mM glucose or 500  $\mu$ M oleate, in the absence or presence of 1  $\mu$ M insulin for 3 h. Nutrient (none, glucose, oleate) and insulin (absence, presence) treatments were the main factors, whereas nutrient x insulin was the first order interaction.

|                                 | Parameter                 | Factor 1 | Factor 2 | Interaction        |
|---------------------------------|---------------------------|----------|----------|--------------------|
|                                 |                           | Nutrient | Insulin  | Nutrient x Insulin |
| <b><u>Enzyme activities</u></b> | <b>Glucosensing</b>       |          |          |                    |
|                                 | Gck                       | 0.950    | <0.001   | 0.039              |
|                                 | Gsase                     | <0.001   | <0.001   | 0.007              |
|                                 | Pepck                     | <0.001   | 0.117    | 0.018              |
|                                 | Pk                        | 0.559    | 0.257    | 0.048              |
|                                 | <b>Fatty acid sensing</b> |          |          |                    |
|                                 | Acly                      | 0.025    | 0.021    | 0.004              |
|                                 | Cpt-1                     | <0.001   | 0.008    | 0.003              |
|                                 | Fas                       | 0.038    | 0.228    | 0.025              |
|                                 | Hoad                      | 0.075    | <0.001   | 0.157              |
| <b><u>mRNA abundance</u></b>    | <b>Glucosensing</b>       |          |          |                    |
|                                 | <i>fbpase</i>             | 0.589    | 0.313    | 0.020              |
|                                 | <i>g6pcb</i>              | 0.009    | 0.027    | 0.005              |
|                                 | <i>gck</i>                | 0.043    | <0.001   | <0.001             |
|                                 | <i>gnat3</i>              | 0.009    | 0.974    | 0.054              |
|                                 | <i>gys1</i>               | 0.014    | 0.415    | 0.006              |
|                                 | <i>nr1h3</i>              | 0.018    | 0.037    | 0.146              |
|                                 | <i>pck1</i>               | 0.023    | 0.634    | 0.004              |
|                                 | <i>pklr</i>               | 0.042    | 0.518    | <0.001             |
|                                 | <i>slc2a2</i>             | 0.037    | 0.033    | <0.001             |
|                                 | <i>slc5a1</i>             | 0.075    | 0.849    | 0.039              |
|                                 | <i>tas1r3</i>             | 0.023    | 0.670    | 0.046              |
|                                 | <b>Fatty acid sensing</b> |          |          |                    |
|                                 | <i>acyl</i>               | 0.914    | 0.011    | 0.009              |

|                              |                                |        |       |        |
|------------------------------|--------------------------------|--------|-------|--------|
|                              | <i>cd36</i>                    | 0.036  | 0.128 | 0.110  |
|                              | <i>cpt1c</i>                   | 0.247  | 0.181 | 0.884  |
|                              | <i>fasn</i>                    | 0.013  | 0.429 | 0.037  |
|                              | <i>lpl</i>                     | 0.959  | 0.001 | 0.533  |
|                              | <b>K<sub>ATP</sub></b>         |        |       |        |
|                              | <i>abcc8</i>                   | 0.684  | 0.013 | 0.061  |
|                              | <i>kcnj11</i>                  | 0.004  | 0.003 | <0.001 |
|                              | <b>Mitochondrial activity</b>  |        |       |        |
|                              | <i>ucp2a</i>                   | 0.002  | 0.657 | 0.669  |
|                              | <b>Cell signaling</b>          |        |       |        |
|                              | <i>mtor</i>                    | <0.001 | 0.185 | 0.017  |
|                              | <b>Transcription factors</b>   |        |       |        |
|                              | <i>bsx</i>                     | 0.117  | 0.935 | <0.001 |
|                              | <i>creb1</i>                   | 0.061  | 0.243 | <0.001 |
|                              | <i>foxo1</i>                   | 0.079  | 0.914 | 0.029  |
|                              | <i>ppara</i>                   | 0.314  | 0.161 | 0.003  |
|                              | <i>pparg</i>                   | 0.012  | 0.280 | 0.095  |
|                              | <i>srebf</i>                   | 0.019  | 0.257 | 0.007  |
|                              | <b>Neuropeptides</b>           |        |       |        |
|                              | <i>agrp1</i>                   | 0.037  | 0.020 | 0.087  |
|                              | <i>cartpt</i>                  | 0.087  | 0.176 | 0.027  |
|                              | <i>npy</i>                     | 0.001  | 0.233 | <0.001 |
|                              | <i>pomcal</i>                  | 0.003  | 0.014 | 0.016  |
| <b><u>Protein levels</u></b> | <b>Cell signaling</b>          |        |       |        |
|                              | P-Akt/vinculin                 | 0.731  | 0.215 | 0.569  |
|                              | Akt/vinculin                   | 0.819  | 0.894 | 0.390  |
|                              | P-Akt/Akt                      | 0.750  | 0.015 | 0.129  |
|                              | P-Ampk $\alpha$ /vinculin      | 0.173  | 0.772 | 0.606  |
|                              | Ampk $\alpha$ /vinculin        | 0.825  | 0.159 | 0.790  |
|                              | P-Ampk $\alpha$ /Ampk $\alpha$ | 0.209  | 0.844 | 0.369  |
|                              | Mtor/vinculin                  | 0.820  | 0.917 | 0.873  |
|                              | <b>Transcription factors</b>   |        |       |        |
|                              | P-Creb/vinculin                | 0.620  | 0.523 | 0.819  |
|                              | Creb/vinculin                  | 0.991  | 0.572 | 0.979  |

|  |                  |       |       |        |
|--|------------------|-------|-------|--------|
|  | P-Creb/Creb      | 0.994 | 0.281 | 0.557  |
|  | P-Foxo1/vinculin | 0.028 | 0.371 | <0.001 |
|  | Foxo1/vinculin   | 0.213 | 0.572 | 0.949  |
|  | P-Foxo1/Foxo1    | 0.565 | 0.002 | 0.047  |
